# Supplementary material for: Inhibition of JAK-STAT Signaling with Baricitinib Reduces Inflammation and Improves Cellular Homeostasis in Progeria Cells
Source: MDPI journal article supplement (doi:10.3390/cells8101276), 2019-10-18
Supplement: s1 [file s1]

# **Inhibition of JAK-STAT signaling with baricitinib reduces inflammation and improves cellular homeostasis in progeria cells**

**Chang Liu <sup>1</sup>, Rouven Arnold <sup>1</sup>, Gonçalo Henriques <sup>1</sup> and Karima Djabali <sup>1,\*</sup>**

<sup>1</sup> Epigenetics of Aging, Department of Dermatology, TUM school of Medicine, Technical University of Munich (TUM), Garching-Munich, Germany

\* Correspondence: [djabali@tum.de](mailto:djabali@tum.de), Tel: +49-89-289-10920

Received: date; Accepted: date; Published: date

**Table S1 (Supplementary Dataset File 1).** Excel file of the list of genes associated with vascular disease, arthritis, lipodystrophy and alopecia derived from the text mining analysis.

**Table S3 (Supplementary Dataset File2).** Excel file of the identified list of transcription factors that regulate the 17 genes derived from text mining.

**Table S2:** Differential regulation of the 17 genes altered in all four conditions. Vascular disease (VD), arthritis (AR), lipodystrophy (LD) and alopecia (AL). The level of expression according to curated literature ( $\uparrow$  = overexpressed;  $\downarrow$  = downregulated) in of each gene in each disease is indicated.

| Gene<br>(swiss-prot<br>gene ID)                              |           | Expression       | Function                                                                                                                                                                                                                                  |
|--------------------------------------------------------------|-----------|------------------|-------------------------------------------------------------------------------------------------------------------------------------------------------------------------------------------------------------------------------------------|
| <b>PPAR<math>\gamma</math></b><br>(receptor)<br>ID: 5468     | <b>VD</b> | $\downarrow$ [1] | Protects endothelia, regulates the differentiation of adipocytes and lipid metabolism, inhibits proliferation and the migration of smooth muscle cells, and reduces inflammatory chemokines [1].                                          |
|                                                              | <b>AR</b> | $\downarrow$ [2] | Inhibits major signaling pathways of inflammation and reduces the synthesis of cartilage catabolic factors responsible for articular cartilage degradation [3].                                                                           |
|                                                              | <b>LD</b> | $\downarrow$ [4] | Essential in the differentiation of adipocytes [5].                                                                                                                                                                                       |
|                                                              | <b>AL</b> | $\downarrow$ [6] | Required for the maintenance of a functional epithelial stem cell compartment in murine hair follicles [7].                                                                                                                               |
| <b>CCL2</b><br>(chemokine)<br>ID: 6347                       | <b>VD</b> | $\uparrow$ [8]   | Recruits macrophages and monocytes to the vessel wall [9].                                                                                                                                                                                |
|                                                              | <b>AR</b> | $\uparrow$ [10]  | Mediator of the migration of monocytes, macrophages and T cells. These are directly involved in the induction and perpetuation of synovitis and subsequent joint destruction [10].                                                        |
|                                                              | <b>LD</b> | $\uparrow$ [11]  | Recruits macrophages to adipose tissue and induces an inflammatory response [12].                                                                                                                                                         |
|                                                              | <b>AL</b> | $\uparrow$ [13]  | Recruits monocytes and lymphocytes T in the acute inflammatory condition and it may also be an important mediator in chronic inflammation [14].                                                                                           |
| <b>TGF<math>\beta</math>1</b><br>(growth factor)<br>ID: 7040 | <b>VD</b> | $\uparrow$ [15]  | There is a link between increased levels of circulating TGF $\beta$ and hypertension, a cardiovascular risk factor which contributes to the development of organ damage such as renal sclerosis, stroke, and coronary heart disease [16]. |
|                                                              | <b>AR</b> | $\uparrow$ [17]  | Transforming growth factor beta1 (TGFbeta1) has been reported to have important roles in unresolved inflammation, immune suppression, fibrosing processes, and angiogenesis [18].                                                         |
|                                                              | <b>LD</b> | $\uparrow$ [19]  | Potent inhibitor of adipocyte differentiation [19].                                                                                                                                                                                       |
|                                                              | <b>AL</b> | $\uparrow$ [20]  | Influences the epithelial cell growth, and modulates androgen receptor transactivation and androgen sensitivity in dermal papilla cells [20].                                                                                             |
| <b>CXCL8</b><br>(Chemokine)<br>ID: 3576                      | <b>VD</b> | $\uparrow$ [21]  | Stimulates the adhesion of monocytes to endothelial cells, and has a role in plaque destabilization [22,23].                                                                                                                              |
|                                                              | <b>AR</b> | $\uparrow$ [24]  | Induces synovial inflammation, regulates leukocyte adhesion molecule expression, and it is a mediator of angiogenesis [25].                                                                                                               |
|                                                              | <b>LD</b> | $\uparrow$ [26]  | Major regulator of adipose tissue metabolism. Its overexpression in subcutaneous adipose tissue may be associated with wasting processes that lead to atrophy [26,27].                                                                    |
|                                                              | <b>AL</b> | $\uparrow$ [28]  | Plays a role in perturbing keratinocyte differentiation in the AA follicle [29].                                                                                                                                                          |
| <b>ICAM1</b><br>(adhesion molecule)<br>ID: 3383              | <b>VD</b> | $\uparrow$ [30]  | Key molecule in atherogenesis, when circulating monocytes adhere to the endothelium and subsequently transmigrate into the intima [31].                                                                                                   |
|                                                              | <b>AR</b> | $\uparrow$ [32]  | Promotes leukocyte adhesion to endothelial cells and synovial fibroblasts, and promotes leukocyte migration [33].                                                                                                                         |

|                                                                        |           |          |                                                                                                                                                                                                                                       |
|------------------------------------------------------------------------|-----------|----------|---------------------------------------------------------------------------------------------------------------------------------------------------------------------------------------------------------------------------------------|
|                                                                        | <b>LD</b> | ↑[34]    | UNKNOWN                                                                                                                                                                                                                               |
|                                                                        | <b>AL</b> | ↑[35]    | Together with gamma interferon mediates T cell trafficking in the skin [36].                                                                                                                                                          |
| <b>CRP</b><br>(pentraxin)<br>ID: 1401                                  | <b>VD</b> | ↑[37]    | Directly influences complement activation, apoptosis, vascular cell activation, monocyte recruitment, lipid accumulation and thrombosis. Associated with the formation and progression of atherosclerotic lesions [38,39].            |
|                                                                        | <b>AR</b> | ↑[40]    | Plays a role in the bony destructive process through the induction of RANKL expression and direct differentiation of osteoclasts precursors into mature osteoclasts [41].                                                             |
|                                                                        | <b>LD</b> | ↑[42]    | Its levels are strongly associated with adipose tissue mass [43].                                                                                                                                                                     |
|                                                                        | <b>AL</b> | ↑[44]    | UNKNOWN                                                                                                                                                                                                                               |
| <b>C3</b><br>(Chemokine)<br>ID: 718                                    | <b>VD</b> | ↑[45]    | Essential in the maturation of atherosclerotic lesions beyond the foam cell stage [46].                                                                                                                                               |
|                                                                        | <b>AR</b> | ↑[47]    | Contributes to inflammation and tissue injury. Has a role in the induction and progression of the disease [47].                                                                                                                       |
|                                                                        | <b>LD</b> | ↓[48]    | Excessive consumption of C3 in the alternative complement pathway leads to an increased expression of Factor D. Lipodystrophy and tissue destruction are more significant in tissues where Factor D expression is increased [49,50].  |
|                                                                        | <b>AL</b> | ↑[51]    | C3 deposition reflects the morphological state of hair follicles in each stage of the hair cycle, suggesting a relationship between the hair cycle and C3 deposition [52].                                                            |
| <b>TRAF1</b><br>(tumor<br>necrose<br>factor<br>associated)<br>ID: 7185 | <b>VD</b> | ↑[53]    | Involved in monocyte recruitment to the vessel wall [54].                                                                                                                                                                             |
|                                                                        | <b>AR</b> | ↑[55]    | Plays a crucial role in the pathogenesis of autoantibodies and may serve as a serologic inflammatory marker of disease activity [55].                                                                                                 |
|                                                                        | <b>LD</b> | ↑[56,57] | UNKNOWN                                                                                                                                                                                                                               |
|                                                                        | <b>AL</b> | ↑[58]    | UNKNOWN                                                                                                                                                                                                                               |
| <b>IL18</b><br>(Interleukin)<br>ID: 7185                               | <b>VD</b> | ↑[59]    | Has a proatherogenic effect through stimulation of IFN- $\gamma$ secretion. It polarizes T helper 1 cells and induces the production of inflammatory cytokines, chemokines, and vascular adhesion molecules [60,61].                  |
|                                                                        | <b>AR</b> | ↑[62]    | Promotes articular Th1 responses, acts directly on macrophages to induce proinflammatory cytokine production, and contributes to cartilage degradation [63].                                                                          |
|                                                                        | <b>LD</b> | ↑[64]    | Induces apoptosis of subcutaneous adipocytes in lipotrophic areas, and it contributes towards HALS by downregulating the production of adiponectin [64,65].                                                                           |
|                                                                        | <b>AL</b> | ↑[66]    | Induces the production of IFN- $\gamma$ , a factor that induces alopecia [67].                                                                                                                                                        |
| <b>IGF1</b><br>(growth<br>factor)<br>ID: 3479                          | <b>VD</b> | ↓[68]    | Reduces atherosclerosis burden and improves features of atherosclerotic plaque stability through induction of the reduction of oxidative stress, cell apoptosis, proinflammatory signaling, and endothelial dysfunction [68].         |
|                                                                        | <b>AR</b> | ↓[69]    | Enhances the synthesis of components such as proteoglycan and collagen in normal cartilage, and blocks cytokine-stimulated cartilage degradation. It is an important regulator of the repair processes during joint diseases [70,71]. |

|                                                    |           |        |                                                                                                                                                                                                                                                                                                                                                                                                                                                                                                                                |
|----------------------------------------------------|-----------|--------|--------------------------------------------------------------------------------------------------------------------------------------------------------------------------------------------------------------------------------------------------------------------------------------------------------------------------------------------------------------------------------------------------------------------------------------------------------------------------------------------------------------------------------|
|                                                    | <b>LD</b> | ↓[72]  | IGF1 signaling is essential for the development and function of adipose tissue. The IGF1 receptors play a role in gene expression in white adipose tissue and in the maintenance of normal serum leptin and adiponectin levels [72].                                                                                                                                                                                                                                                                                           |
|                                                    | <b>AL</b> | ↓[73]  | Stimulates follicular epithelial cell growth [74].                                                                                                                                                                                                                                                                                                                                                                                                                                                                             |
| <b>IL6</b><br>(Interleukin)<br>ID: 3569            | <b>VD</b> | ↑[75]  | Plays a central role in propagating the downstream inflammatory response responsible for atherosclerosis. Contributes to both atherosclerotic plaque development and plaque destabilization [76,77].                                                                                                                                                                                                                                                                                                                           |
|                                                    | <b>AR</b> | ↑[78]  | Contributes to the induction and maintenance of the autoimmune process through B cell modulation and Th17 cell differentiation, and it plays a role in angiogenesis by inducing intracellular adhesion molecules [79].                                                                                                                                                                                                                                                                                                         |
|                                                    | <b>LD</b> | ↑[80]  | Leads to increased apoptosis and thus contributes to the loss of subcutaneous fat [81].                                                                                                                                                                                                                                                                                                                                                                                                                                        |
|                                                    | <b>AL</b> | ↑[82]  | Induces a rise in immunoglobulin G which can have a key role in long-standing disease due to humoral autoimmune pathology, and plays a partial role in hair growth inhibition [82,83].                                                                                                                                                                                                                                                                                                                                         |
| <b>TNFα</b><br>(tumor necrosis factor)<br>ID: 7124 | <b>VD</b> | ↑[84]  | Promotes cholesterol uptake into monocytes and macrophages and cholesteryl ester-laden cell formation from differentiating monocytes, resulting in foam cell accumulation; it is involved in the production of chemokines and in the recruitment of leucocytes during inflammatory reactions; induces VSMCs proliferation; increases adherence of leucocytes to endothelial cells by inducing the expression of cell adhesion molecules; stimulates apoptosis of VSMCs; and it can induce autophagy in plaque VSMCs [84-86].   |
|                                                    | <b>AR</b> | ↑[87]  | Stimulates the production of cytokines, chemokines and prostaglandins in RA synovium; stimulates the production of matrix-degrading enzymes like MMPs; leads to an increase of the destructive potential of RASF; induces the expression of RANKL and synergizes with RANKL to directly promote osteoclast differentiation; and stimulates bone loss by mobilizing CD11b <sup>+</sup> osteoclast precursors from the bone marrow and by reducing bone formation by inhibiting osteoblast differentiation and function [88-90]. |
|                                                    | <b>LD</b> | ↑[91]  | Stimulates lipolysis; induces insulin resistance, leptin production, suppression of lipogenesis, adipocyte dedifferentiation, and apoptosis in preadipocytes and adipocytes; and impairs preadipocyte differentiation [92,93].                                                                                                                                                                                                                                                                                                 |
|                                                    | <b>AL</b> | ↑[94]  | Causes the condensation and distortion of the dermal papilla, marked vacuolation of the hair follicle matrix, abnormal keratinization of the follicle bulb and inner root sheath, disruption of follicular melanocytes and the presence of melanin granules within the dermal papilla, resulting in the formation of dystrophic anagen hair follicles [95,96].                                                                                                                                                                 |
| <b>HMOX1</b><br>(oxygenase)<br>ID: 3162            | <b>VD</b> | ↓[97]  | Its expression in macrophages increases antioxidant protection and decreases inflammatory components of atherosclerotic lesions, having a role in the protection against atherogenesis [98].                                                                                                                                                                                                                                                                                                                                   |
|                                                    | <b>AR</b> | ↓[99]  | Inhibits cartilage erosion, decreases proinflammatory cytokine secretion, and suppresses osteoclastogenesis and bone destruction [100].                                                                                                                                                                                                                                                                                                                                                                                        |
|                                                    | <b>LD</b> | ↓[101] | UNKNOWN                                                                                                                                                                                                                                                                                                                                                                                                                                                                                                                        |

|                                         |           |        |                                                                                                                                                                                                                                                                                                                                                                                                                                                                                                 |
|-----------------------------------------|-----------|--------|-------------------------------------------------------------------------------------------------------------------------------------------------------------------------------------------------------------------------------------------------------------------------------------------------------------------------------------------------------------------------------------------------------------------------------------------------------------------------------------------------|
|                                         | <b>AL</b> | ↓[102] | Its decreased expression causes the impairment of the protective mechanism from oxidative stress in the scalp [102].                                                                                                                                                                                                                                                                                                                                                                            |
| <b>LEP</b><br>(adipokine)<br>ID: 3952   | <b>VD</b> | ↑[103] | leptin as an important mediator in endothelial dysfunction and neointimal hyperplasia, both key steps in the evolution of atherosclerotic vascular changes. Additionally, aracrine leptin release from perivascular adipose tissue (PVAT) has deleterious effects on the underlying endothelium and vascular smooth muscle cells (SMC), including the coronary circulation [103].                                                                                                               |
|                                         | <b>AR</b> | ↑[104] | Adipocyte-derived leptin induces proinflammatory cytokine release from innate and adaptive immune cells, producing an inflammatory milieu that encourages cartilage damage and rheumatoid arthritis [104].                                                                                                                                                                                                                                                                                      |
|                                         | <b>LD</b> | ↓[105] | Leptin has key roles in the regulation of energy balance, body weight, metabolism, and endocrine function. Leptin levels are undetectable or very low in patients with lipodystrophy, hypothalamic amenorrhea, and congenital leptin deficiency (CLD) due to mutations in the leptin gene [105].                                                                                                                                                                                                |
|                                         | <b>AL</b> | ↑[106] | The plasma leptin level was significantly higher in AGA subjects, compared to non-AGA subjects (4.45 vs 2.76 ng/mL, P<.05). Leptin from the circulation might impact the development of AGA [106].                                                                                                                                                                                                                                                                                              |
| <b>IL4</b><br>(Interleukin)<br>ID: 3565 | <b>VD</b> | ↑[107] | IL-4 can induce apoptosis of human vascular endothelial cells through the caspase-3-dependent pathway, suggesting that IL-4 can increase endothelial cell turnover by accelerated apoptosis, the event which may cause the dysfunction of the vascular endothelium [107].                                                                                                                                                                                                                       |
|                                         | <b>AR</b> | ↑[108] | IL4 improves anti-inflammatory effect and suppresses several pro-inflammatory cytokines and systemic IL4 treatment protects the cartilage and bone destruction in established murine type II collagen-induced arthritis. IL-4 has an inhibiting effect on the degradation of proteoglycans in the articular cartilage, by inhibiting the secretion of MMPs metalloproteinases, as well as reducing the variation in the production of proteoglycans that are visible in the course of OA [108]. |
|                                         | <b>LD</b> | ↓[109] | IL-4 has important role in lipid metabolism and regulation of glucose by promoting insulin sensitivity and glucose tolerance. Lower insulin sensitivity reduced uptake of fatty acids, reduced glucose transport, and increased free fatty acids (FFA) in the general circulation and that can lead to lipodystrophy [109].                                                                                                                                                                     |
|                                         | <b>AL</b> | ↑[110] | Alopecia development is associated with CD8(+) T cell activation, migration into the intrafollicular region, and hair follicle destruction. The disease may be adoptively transferred with T lymphocytes and is class I and not class II MHC-dependent. Pathologic T cells primarily express IFNG and IL-17 early in disease, with dramatic increases in cytokine production and recruitment of IL-4 and IL-10 production with disease progression [110].                                       |
| <b>IFNG</b><br>(Interferon)<br>ID: 3458 | <b>VD</b> | ↑[111] | IFN-g, known to be a pro-inflammatory cytokine, can also display anti-inflammatory properties. it is likely that it acts in both ways in atherosclerosis. it is possible that its proatherogenic actions out-weigh its anti-atherogenic ones or vice versa. IFN-g promotes                                                                                                                                                                                                                      |

---

|  |           |        |                                                                                                                                                                                                                                                         |
|--|-----------|--------|---------------------------------------------------------------------------------------------------------------------------------------------------------------------------------------------------------------------------------------------------------|
|  |           |        | foam cell formation, plaque development and a Th1-driven adaptive immune response. These effects can be attributed to an array of key genes, involved in atherosclerosis, that are regulated by IFN- $\gamma$ [111].                                    |
|  | <b>AR</b> | ↓[112] | IFN- $\gamma$ activity associated with necroptosis suggests that IFN- $\gamma$ may modulate necroptosis and improve RA progression by preventing or reducing inflammatory cell death [112].                                                             |
|  | <b>LD</b> | ↑[113] | Cytokines play important roles in the pathogenesis of lipodystrophy syndrome. Single nucleotide polymorphisms (SNPs) at position +874 (T/A) of the interferon-gamma gene are related to the expression of these cytokines [114].                        |
|  | <b>AL</b> | ↑[115] | IFN- $\gamma$ rapidly inhibited hair elongation in cultured human anagen hair follicles and induced morphological signs of catagen transformation. IFN- $\gamma$ can also inhibit proliferation, increase apoptosis and follicular melanogenesis [115]. |

**Table S4.** Primers used for the real-time quantitative PCR analysis of the 17 genes identified by text mining

| Primer                                                               | Target Gene | Product size(bp) | Melting Temp     | Info  |
|----------------------------------------------------------------------|-------------|------------------|------------------|-------|
| FW:5'-AATGGCGAGATCCCCTTGA-3'<br>REV:5'-GCACCGGCTTTCATAGAATCTCT-3'    | JAK1        | 66               | 62.9°C<br>63.0°C | [116] |
| FW:5'-TGATTTTGTGCACGGATGGA-3'<br>REV:5'-ACTGCCATCCCAAGACATTCTT-3'    | JAK2        | 72               | 63.4°C<br>62.1°C | [116] |
| FW:5'-GCCTGGAGTGGCATGAGAA-3'<br>REV:5'-CCCCGGTAAATCTTGGTGAA-3'       | JAK3        | 55               | 62.4°C<br>62.0°C | [117] |
| FW:5'-GGGACCGTGGGCAGGAGCTA-3'<br>REV:5'-GTGCGTGTGGGAGACCTGGC-3'      | TYK2        | 116              | 69.0°C<br>68.7°C | [116] |
| FW:5'-TTCAGAGCTCGTTTGTGGTG-3'<br>REV:5'-AGAGGTCGTCTCGAGGTCAA-3'      | STAT1       | 419              | 60.0°C<br>60.0°C | [118] |
| FW:5'-CCAAGGCTACCATGCTATTC-3'<br>REV:5'-GCTGGTCTTTCAGTTGGCTG-3'      | STAT2       | 336              | 57.3°C<br>61.0°C | [119] |
| FW:5'-CAGGAGGGCAGTTTGAGTCC-3'<br>REV:5'-CAAAGATAGCAGAAGTAGGAGA-3'    | STAT3       | 218              | 62.1°C<br>53.4°C | [120] |
| FW:5'-CCTGACATTCCCAAAGACAAAGC-3'<br>REV:5'-TCTCTCAACACCGCATACACAC-3' | STAT4       | 203              | 64.2°C<br>61.2°C | [121] |
| FW:5'-TTACTGAAGATCAAGCTGGGG-3'<br>REV:5'-TCATTGTACAGAATGTGCCGG-3'    | STAT5A      | 104              | 59.3°C<br>61.9°C | [122] |
| FW:5'-CATTTTCCCATTGAGGTGCG-3'<br>REV:5'-GGGTGGCCTTAATGTTCTCC-3'      | STAT5B      | 103              | 63.6°C<br>60.7°C | [122] |
| FW:5'-CCTTGGAGAACAGCATTCCTGG-3'<br>REV:5'-GCACTTCTCCTCTGTGACAGAC-3'  | STAT6       | 116              | 65.3°C<br>59.1°C | [123] |
| FW:5'-GAGCCAGGAGTGGACTATGTGTA-3'<br>REV:5'-CAATGGCCATGATGTACTCG-3'   | C3          | 85               | 60.6°C<br>59.9°C | [124] |
| FW:5'-AGCATGAAAGTCTCTGCCGC-3'<br>REV:5'-GGCATTGATTGCATCTGGCTG-3'     | CCL2        | 93               | 62.9°C<br>66.0°C | [125] |
| FW:5'-CTTTTGGCCAGACAGACATG-3'<br>REV:5'-GTGTAGAAGTGGAGGCACA-3'       | CRP         | 130              | 59.3°C<br>54.5°C | [126] |
| FW:5'-CTGGCCGTGGCTCTCTTG-3'<br>REV:5'-CCTTGGCAAACTGCACCTT-3'         | CXCL8       | 69               | 63.2°C<br>62.5°C | [125] |
| FW:5'-TGAAGGACATGGCTTAGAAGTG-3'<br>REV:5'-GGTGCAAGGGTCACAGTGTT-3'    | FAS         | 118              | 59.4°C<br>61.0°C | [127] |
| FW:5'-ACTGCGTTCCTGCTCAACATC-3'<br>REV:5'-GCTCTGGTCCTTGGTGTCATG-3'    | HMOX1       | 75               | 62.7°C<br>63.0°C | [128] |
| FW:5'-ATGCCCAGACATCTGTGTCC-3'<br>REV:5'-GGGGTCTCTATGCCCAACAA-3'      | ICAM1       | 112              | 61.0°C<br>62.2°C | [129] |
| FW:5'-GTCCAACGCAAAGCAATACATG-3'<br>REV:5'-CCTTTTTCGCTTCCCTGTTTTAG-3' | IFN-G       | 81               | 62.6°C<br>62.4°C | [130] |
| FW:5'-GGCACAATTACTGCTCCAAAGAC-3'<br>REV:5'-CAAGGCCCTTCTCCCCAC-3'     | IGF1        | 121              | 62.2°C<br>64.1°C | [131] |
| FW:5'-ATCGCTTCCTCTCGCAACAA-3'<br>REV:5'-CTTCTACTGGTTCAGCAGCCATCT-3'  | IL18        | 64               | 63.3°C<br>63.3°C | [132] |

---

|                                                                     |       |     |                  |       |
|---------------------------------------------------------------------|-------|-----|------------------|-------|
| FW:5'-AACAGCCTCACAGAGCAGAAGAC-3'<br>REV:5'-GTGTTCTTGGAGGCAGCAAAG-3' | IL4   | 74  | 62.4°C<br>62.2°C | [130] |
| FW:5'-GGTACATCCTCGACGGCATCT-3'<br>REV:5'-GTGCCTCTTTGCTGCTTTTAC-3'   | IL6   | 81  | 63.6°C<br>62.4°C | [133] |
| FW:5'-TCCCCTCTTGACCCATCTC-3'<br>REV:5'-GGGAACCTTGTCTGGTCAT-3'       | LEP   | 110 | 60.0°C<br>58.8°C | [134] |
| FW:5'-TGATTTTGTGCACGGATGGA-3'<br>REV:5'-ACTGCCATCCCAAGACATTCTT-3'   | PPARG | 105 | 55.4°C<br>54.6°C | [135] |
| FW:5'-CCCAGCATCTGCAAAGCTC-3'<br>REV:5'-GTCAATGTACAGCTGCCGCA-3'      | TGFB1 | 101 | 62.1°C<br>63.4°C | [136] |
| FW:5'-TCAGATCATCTTCTCGAACCCC-3'<br>REV:5'-ATCTCTCAGCTCCACGCCAT-3'   | TNFa  | 134 | 62.7°C<br>62.3°C | [137] |
| FW:5'-CATGAGAGGGGAGTATGATG-3'<br>REV:5'-GAAGAAGAGTGGGCATCCAC-3'     | TRAF1 | 181 | 55.4°C<br>59.7°C | [138] |
| FW:5'-CTCTGCTCCTCCTGTTTCGAC-3'<br>REV:5'-TTAAAAGCAGCCCTGGTGAC-3'    | GAPDH | 144 | 60.1°C<br>60.2°C | [139] |



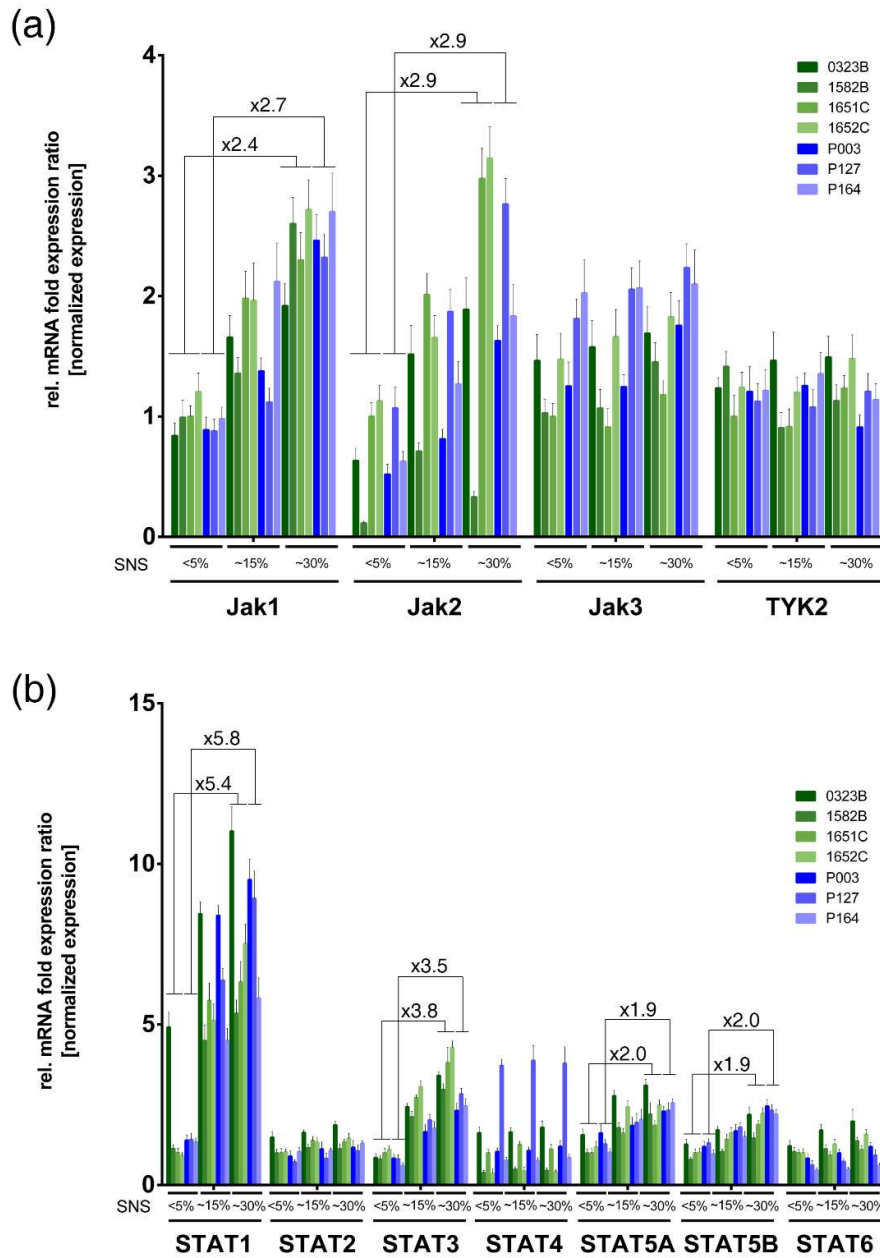

**Figure S1.** Real-time PCR analysis of the JAKs and STATs gene families in normal and HGPS cells. **(a)** mRNA levels of JAK1, 2, 3, and TYK2 in control (GMO1651c, GMO1652c, GMO1582B, and GMO0323B) and HGPS (HGADFN003, HGADFN127, and HGADFN164) cells from cultures of indicated senescence index. **(b)** mRNA levels of STAT1,2,3,4,5a,5b and 6 in cell strains as in (a). Relative expression was normalized to the expression of GAPDH. Due to the heterogeneity in the expression levels between cell strains, we only calculated the indicated fold change.

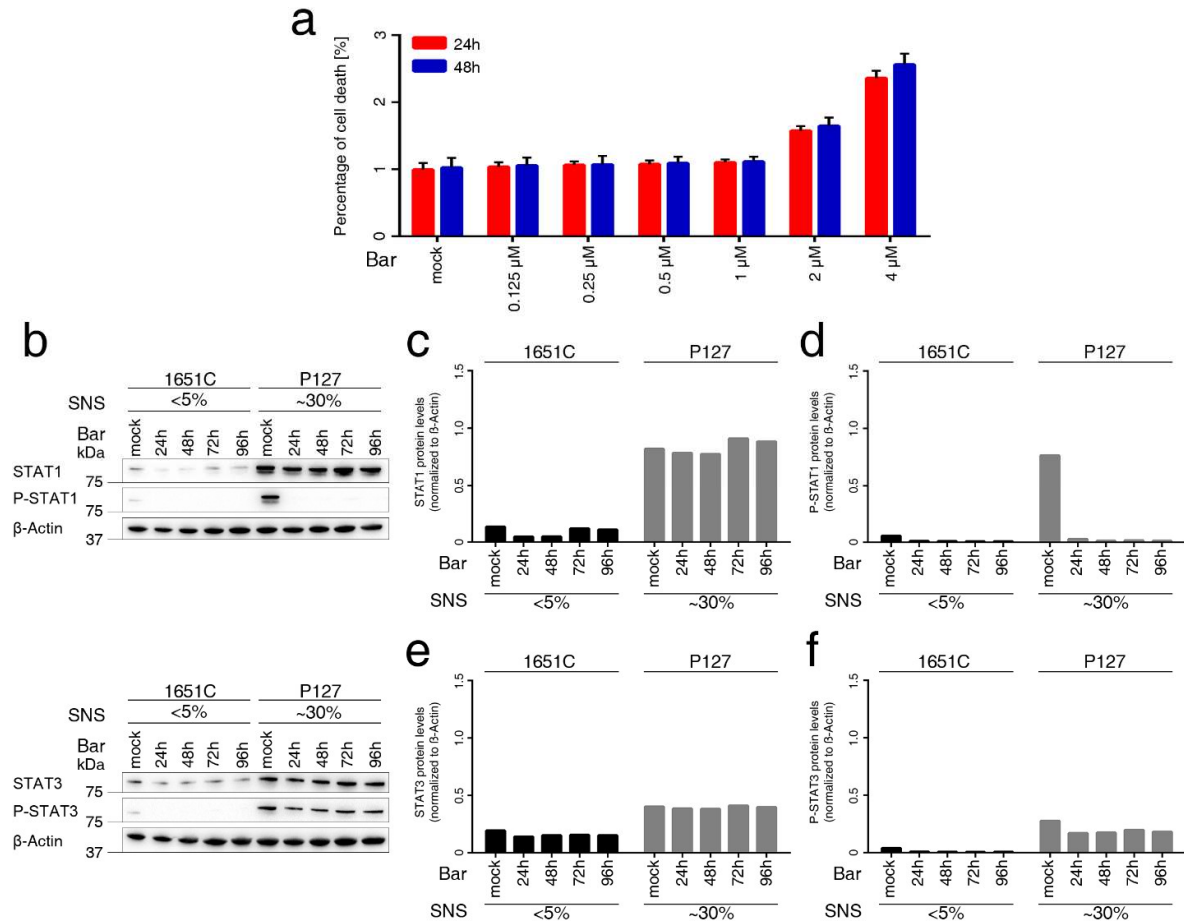

**Figure S2.** Cytotoxicity and stability of Bar in a cell-based aging model. **(a)** Cell cytotoxicity was determined by CellTox™ Green Cytotoxicity Assay kit in control fibroblasts GMO1651C. Cells were treated with Bar at different concentrations (0.125 μM, 0.25 μM, 0.5 μM, 1 μM, 2 μM, 4 μM) for 24 and 48 hours. **(b)** Representative western blot images for STAT1/3 and p-STAT1/3 and β-actin in the control (GMO1651) and HGPS (HGDFN127) cells at the indicated senescence index were treated with Bar or DMSO for indicated period without medium change. **(c-f)** Quantifications of STAT1/3, and p-STAT1/3 are shown. Graphs show the mean (n>3).

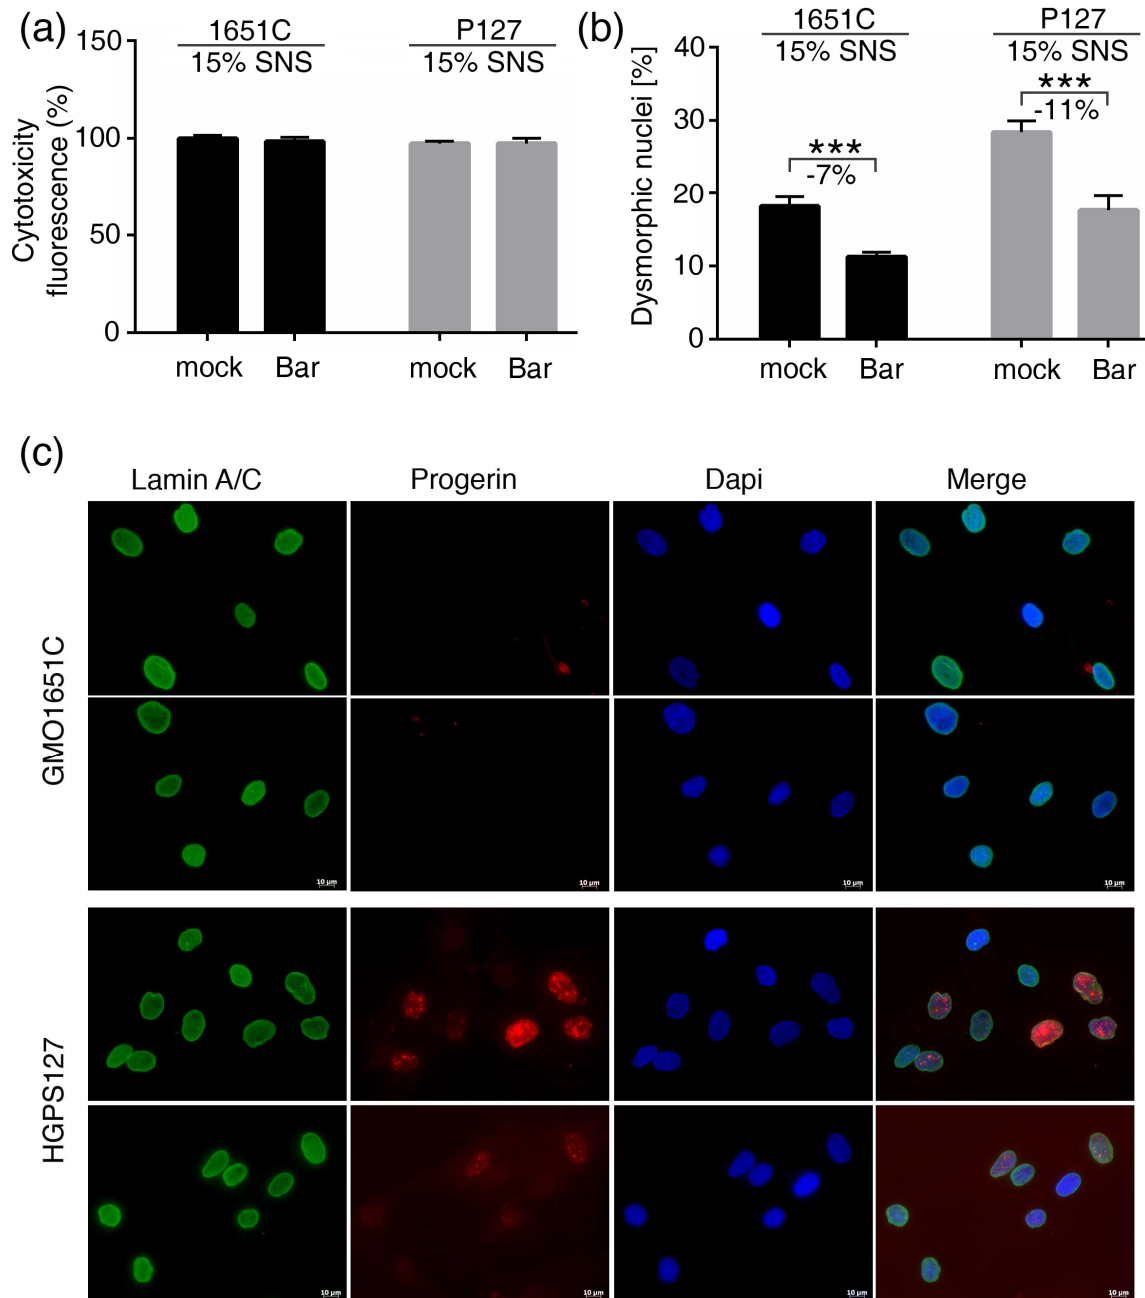

**Figure S3.** Bar treatment ameliorates HGPS nuclear morphology. (a) Cell cytotoxicity was determined using CellTox™ green cytotoxicity assay on mock-treated or Bar-treated control (GMO1651C) and HGPS (HGADFN127) fibroblasts at the indicated senescence index (48 hours treatment). (b) The frequency of misshapen nuclei (dysmorphic) after 20 days of treatment with either DMSO or 1.0  $\mu$ M Bar. An average of 1000 nuclei were examined for each condition, and each experiment was repeated 3 times. (c) Immunocytochemistry was performed on mock-treated or Temozolomide-treated control (GMO1651C) and HGPS (HGADFN127) fibroblasts after 20 days using antibodies against the indicated proteins (lamin A/C, and progerin). Representative images are shown. Scale-bar: 10  $\mu$ m.

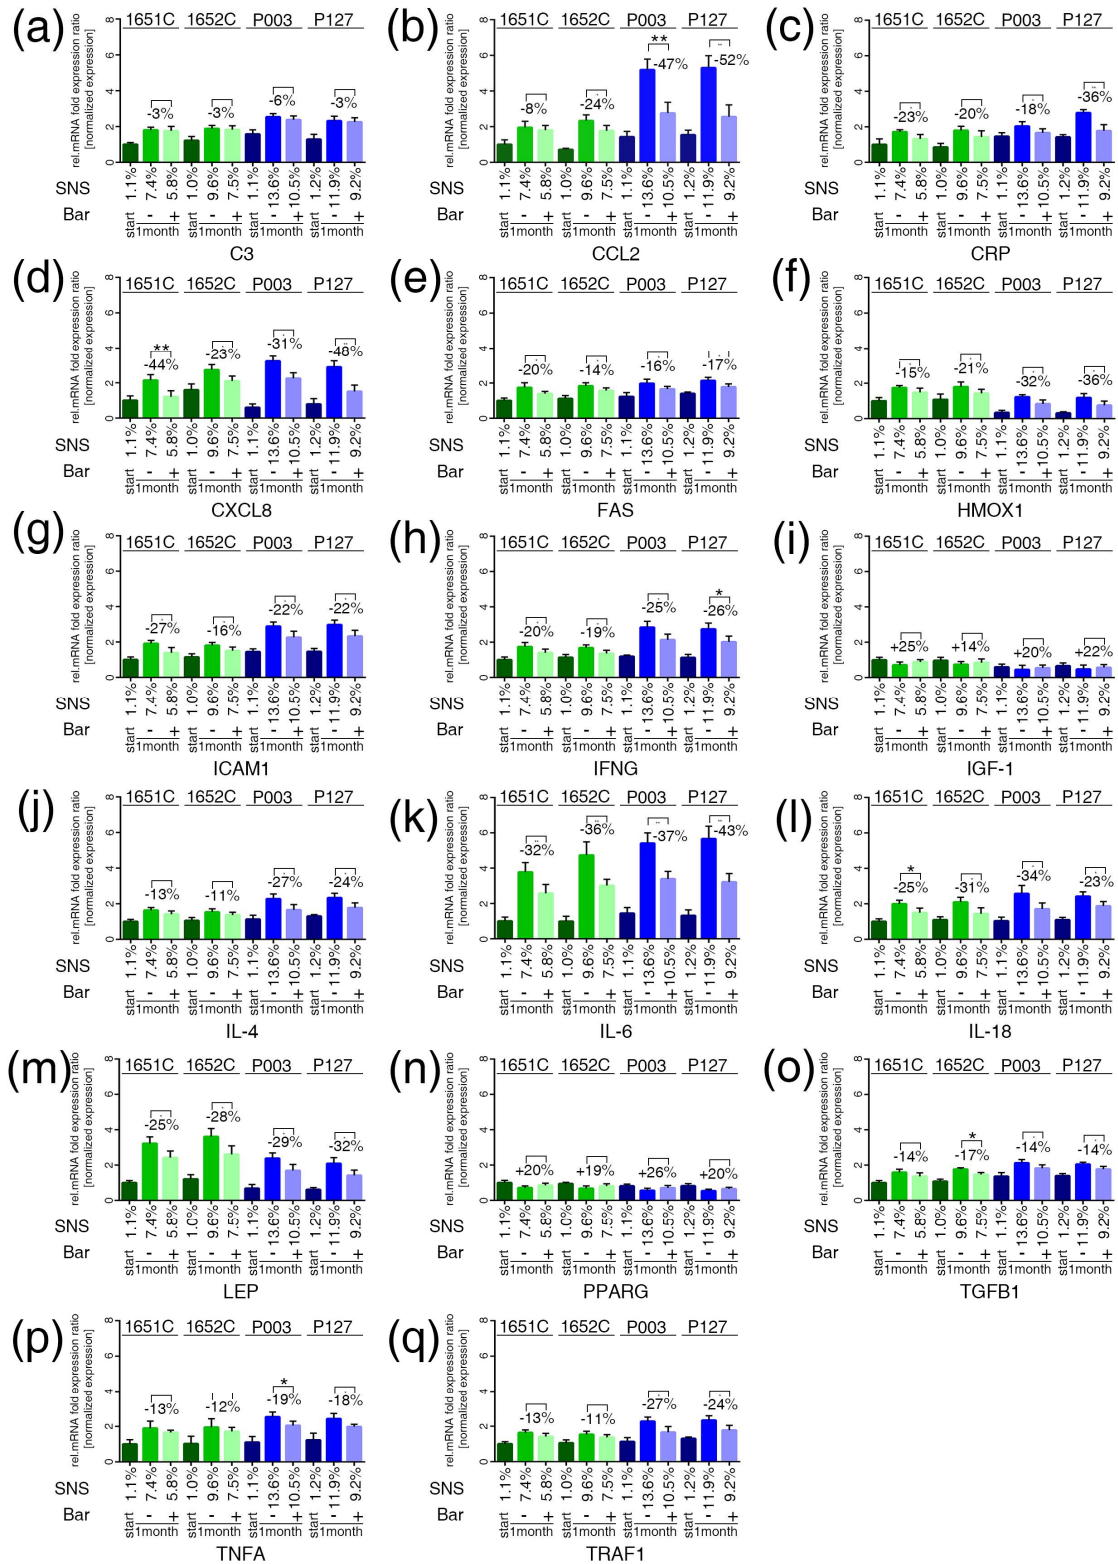

**Figure S4.** Real-time PCR analysis of the 17 genes identified by text mining in normal and HGPS cells treated with Bar for 1 month. **(a-q)** mRNA levels of indicated genes were determined in controls (GMO1651c, GMO1652c) and HGPS (HGADFN003 and HGADFN127) cell strains. The starting senescence index of the culture is indicated (Start SNS). The senescence index of the cultures at the end of the treatment is indicated. Relative expression was normalized to the expression of GAPDH. Graphs show mean  $\pm$  SD ( $n \geq 3$ ). Comparisons were performed by two-tailed t test (\*  $P < 0.05$ , \*\*  $P < 0.01$ , \*\*\*  $P < 0.001$ ). The percent change between Bar-treated cells and mock-treated counterparts is indicated.

## References

1. Wei, W.M.; Wu, X.Y.; Li, S.T.; Shen, Q. Pparg gene c161t ct/tt associated with lower blood lipid levels and ischemic stroke from large-artery atherosclerosis in a han population in guangdong. *Neurol Res* **2016**, *38*, 620-624.
2. Butt, C.; Gladman, D.; Rahman, P. Ppar-gamma gene polymorphisms and psoriatic arthritis. *J Rheumatol* **2006**, *33*, 1631-1633.
3. Giaginis, C.; Giagini, A.; Theocharis, S. Peroxisome proliferator-activated receptor-gamma (ppar-gamma) ligands as potential therapeutic agents to treat arthritis. *Pharmacol Res* **2009**, *60*, 160-169.
4. Victoria, B.; Cabezas-Agricola, J.M.; Gonzalez-Mendez, B.; Lattanzi, G.; Del Coco, R.; Loidi, L.; Barreiro, F.; Calvo, C.; Lado-Abeal, J.; Araujo-Vilar, D. Reduced adipogenic gene expression in fibroblasts from a patient with type 2 congenital generalized lipodystrophy. *Diabet Med* **2010**, *27*, 1178-1187.
5. Jiang, C.; Ting, A.T.; Seed, B. Ppar-gamma agonists inhibit production of monocyte inflammatory cytokines. *Nature* **1998**, *391*, 82-86.
6. Gaspar, N.K. Dhea and frontal fibrosing alopecia: Molecular and physiopathological mechanisms. *An Bras Dermatol* **2016**, *91*, 776-780.
7. Harries, M.J.; Paus, R. Scarring alopecia and the ppar-gamma connection. *J Invest Dermatol* **2009**, *129*, 1066-1070.
8. Dinh, Q.N.; Chrissobolis, S.; Diep, H.; Chan, C.T.; Ferens, D.; Drummond, G.R.; Sobey, C.G. Advanced atherosclerosis is associated with inflammation, vascular dysfunction and oxidative stress, but not hypertension. *Pharmacol Res* **2017**, *116*, 70-76.
9. Harrington, J.R. The role of mcp-1 in atherosclerosis. *STEM CELLS* **2000**, *18*, 65-66.
10. Haringman, J.J.; Gerlag, D.M.; Smeets, T.J.; Baeten, D.; van den Bosch, F.; Bresnihan, B.; Breedveld, F.C.; Dinant, H.J.; Legay, F.; Gram, H., *et al.* A randomized controlled trial with an anti-ccl2 (anti-monocyte chemotactic protein 1) monoclonal antibody in patients with rheumatoid arthritis. *Arthritis Rheum* **2006**, *54*, 2387-2392.
11. Villarroya, J.; Diaz-Delfin, J.; Hyink, D.; Domingo, P.; Giral, M.; Klotman, P.E.; Villarroya, F. Hiv type-1 transgene expression in mice alters adipose tissue and adipokine levels: Towards a rodent model of hiv type-1 lipodystrophy. *Antivir Ther* **2010**, *15*, 1021-1028.
12. Wee, K.; Yang, W.; Sugii, S.; Han, W. Towards a mechanistic understanding of lipodystrophy and seipin functions. *Biosci Rep* **2014**, *34*.
13. Hong, S.B.; Jin, S.Y.; Park, H.J.; Jung, J.H.; Sim, W.Y. Analysis of the monocyte chemoattractant protein 1 -2518 promoter polymorphism in korean patients with alopecia areata. *J Korean Med Sci* **2006**, *21*, 90-94.
14. Alzolibani, A.A.; Zari, S.; Ahmed, A.A. Epidemiologic and genetic characteristics of alopecia areata (part 2). *Acta Dermatovenerol Alp Pannonica Adriat* **2012**, *21*, 15-19.
15. Misiakos, E.P.; Kouraklis, G.; Agapitos, E.; Perrea, D.; Karatzas, G.; Boudoulas, H.; Karayannakos, P.E. Expression of pdgf-a, tgfb and vcam-1 during the

- developmental stages of experimental atherosclerosis. *Eur Surg Res* **2001**, 33, 264-269.
16. Laviades, C.; Varo, N.; Diez, J. Transforming growth factor beta in hypertensives with cardio-renal damage. *Hypertension* **2000**, 36, 517-522.
17. Niu, Q.; Cai, B.; Huang, Z.C.; Shi, Y.Y.; Wang, L.L. Disturbed th17/treg balance in patients with rheumatoid arthritis. *Rheumatol Int* **2012**, 32, 2731-2736.
18. Sugiura, Y.; Niimi, T.; Sato, S.; Yoshinouchi, T.; Banno, S.; Naniwa, T.; Maeda, H.; Shimizu, S.; Ueda, R. Transforming growth factor beta1 gene polymorphism in rheumatoid arthritis. *Ann Rheum Dis* **2002**, 61, 826-828.
19. Clouthier, D.E.; Comerford, S.A.; Hammer, R.E. Hepatic fibrosis, glomerulosclerosis, and a lipodystrophy-like syndrome in pepck-tgf-beta1 transgenic mice. *J Clin Invest* **1997**, 100, 2697-2713.
20. Lu, G.Q.; Wu, Z.B.; Chu, X.Y.; Bi, Z.G.; Fan, W.X. An investigation of crosstalk between wnt/beta-catenin and transforming growth factor-beta signaling in androgenetic alopecia. *Medicine (Baltimore)* **2016**, 95, e4297.
21. Kizilay Mancini, Ö.; Lora, M.; Shum-Tim, D.; Nadeau, S.; Rodier, F.; Colmegna, I. A proinflammatory secretome mediates the impaired immunopotency of human mesenchymal stromal cells in elderly patients with atherosclerosis. *STEM CELLS Translational Medicine* **2017**, 6, 1132-1140.
22. Abke, S.; Neumeier, M.; Weigert, J.; Wehrwein, G.; Eggenhofer, E.; Schaffler, A.; Maier, K.; Aslanidis, C.; Scholmerich, J.; Buechler, C. Adiponectin-induced secretion of interleukin-6 (il-6), monocyte chemotactic protein-1 (mcp-1, ccl2) and interleukin-8 (il-8, cxcl8) is impaired in monocytes from patients with type i diabetes. *Cardiovasc Diabetol* **2006**, 5, 17.
23. Koenen, R.R.; Weber, C. Therapeutic targeting of chemokine interactions in atherosclerosis. *Nat Rev Drug Discov* **2010**, 9, 141-153.
24. Manivel, V.A.; Sohrabian, A.; Ronnelid, J. Granulocyte-augmented chemokine production induced by type ii collagen containing immune complexes is mediated via tlr4 in rheumatoid arthritis patients. *Eur J Immunol* **2016**, 46, 2822-2834.
25. Szekanecz, Z.; Kim, J.; Koch, A.E. Chemokines and chemokine receptors in rheumatoid arthritis. *Semin Immunol* **2003**, 15, 15-21.
26. He, G.; Andersen, O.; Haugaard, S.B.; Lihn, A.S.; Pedersen, S.B.; Madsbad, S.; Richelsen, B. Plasminogen activator inhibitor type 1 (pai-1) in plasma and adipose tissue in hiv-associated lipodystrophy syndrome. Implications of adipokines. *Eur J Clin Invest* **2005**, 35, 583-590.
27. Gallego-Escuredo, J.M.; Villarroya, J.; Domingo, P.; Targarona, E.M.; Alegre, M.; Domingo, J.C.; Villarroya, F.; Giralt, M. Differentially altered molecular signature of visceral adipose tissue in hiv-1-associated lipodystrophy. *J Acquir Immune Defic Syndr* **2013**, 64, 142-148.
28. Zhang, X.; Zhao, Y.; Ye, Y.; Li, S.; Qi, S.; Yang, Y.; Cao, H.; Yang, J.; Zhang, X. Lesional infiltration of mast cells, langerhans cells, t cells and local cytokine profiles in alopecia areata. *Arch Dermatol Res* **2015**, 307, 319-331.

- 85 29. Barahmani, N.; Lopez, A.; Babu, D.; Hernandez, M.; Donley, S.E.; Duvic, M. Serum t  
86 helper 1 cytokine levels are greater in patients with alopecia areata regardless of  
87 severity or atopy. *Clin Exp Dermatol* **2010**, *35*, 409-416.
- 88 30. Marzolla, V.; Armani, A.; Mammi, C.; Moss, M.E.; Pagliarini, V.; Pontecorvo, L.;  
89 Antelmi, A.; Fabbri, A.; Rosano, G.; Jaffe, I.Z., *et al.* Essential role of icam-1 in  
90 aldosterone-induced atherosclerosis. *Int J Cardiol* **2017**, *232*, 233-242.
- 91 31. Kitagawa, K.; Matsumoto, M.; Sasaki, T.; Hashimoto, H.; Kuwabara, K.; Ohtsuki, T.;  
92 Hori, M. Involvement of icam-1 in the progression of atherosclerosis in  
93 apoe-knockout mice. *Atherosclerosis* **2002**, *160*, 305-310.
- 94 32. Garg, N.; Krishan, P.; Syngle, A. Atherosclerosis in psoriatic arthritis: A  
95 multiparametric analysis using imaging technique and laboratory markers of  
96 inflammation and vascular function. *Int J Angiol* **2016**, *25*, 222-228.
- 97 33. Yang, C.M.; Luo, S.F.; Hsieh, H.L.; Chi, P.L.; Lin, C.C.; Wu, C.C.; Hsiao, L.D.  
98 Interleukin-1beta induces icam-1 expression enhancing leukocyte adhesion in  
99 human rheumatoid arthritis synovial fibroblasts: Involvement of erk, jnk, ap-1, and  
100 nf-kappab. *J Cell Physiol* **2010**, *224*, 516-526.
- 101 34. Melendez, M.M.; McNurlan, M.A.; Mynarcik, D.C.; Khan, S.; Gelato, M.C.  
102 Endothelial adhesion molecules are associated with inflammation in subjects with  
103 hiv disease. *Clin Infect Dis* **2008**, *46*, 775-780.
- 104 35. Gilhar, A.; Landau, M.; Assy, B.; Ullmann, Y.; Shalaginov, R.; Serafimovich, S.;  
105 Kalish, R.S. Transfer of alopecia areata in the human scalp graft/prkdc(scid) (scid)  
106 mouse system is characterized by a th1 response. *Clin Immunol* **2003**, *106*, 181-187.
- 107 36. Gupta, A.K.; Ellis, C.N.; Cooper, K.D.; Nickoloff, B.J.; Ho, V.C.; Chan, L.S.;  
108 Hamilton, T.A.; Tellner, D.C.; Griffiths, C.E.; Voorhees, J.J. Oral cyclosporine for the  
109 treatment of alopecia areata. A clinical and immunohistochemical analysis. *J Am*  
110 *Acad Dermatol* **1990**, *22*, 242-250.
- 111 37. Pleskovič, A.; Letonja, M.Š.; Vujkovic, A.C.; Starčević, J.N.; Gazdikova, K.;  
112 Caprnda, M.; Gaspar, L.; Kruzliak, P.; Petrovič, D. C-reactive protein as a marker of  
113 progression of carotid atherosclerosis in subjects with type 2 diabetes mellitus. *Vasa*  
114 **2017**, *46*, 187-192.
- 115 38. Paffen, E.; DeMaat, M.P. C-reactive protein in atherosclerosis: A causal factor?  
116 *Cardiovasc Res* **2006**, *71*, 30-39.
- 117 39. Yu, Q.; Li, Y.; Wang, Y.; Zhao, S.; Yang, P.; Chen, Y.; Fan, J.; Liu, E. C-reactive  
118 protein levels are associated with the progression of atherosclerotic lesions in  
119 rabbits. *Histol Histopathol* **2012**, *27*, 529-535.
- 120 40. Sarkar, S.; Alam, M.M.; Das, G.; Datta, S. Inflammatory markers and disease activity  
121 in juvenile idiopathic arthritis. *Indian J Pediatr* **2017**, *84*, 349-356.
- 122 41. Kim, K.W.; Kim, B.M.; Moon, H.W.; Lee, S.H.; Kim, H.R. Role of c-reactive protein  
123 in osteoclastogenesis in rheumatoid arthritis. *Arthritis Res Ther* **2015**, *17*, 41.
- 124 42. Miehle, K.; Ebert, T.; Kralisch, S.; Hoffmann, A.; Kratzsch, J.; Schlogl, H.; Stumvoll,  
125 M.; Fasshauer, M. Progranulin is increased in human and murine lipodystrophy.  
126 *Diabetes Res Clin Pract* **2016**, *120*, 1-7.

- 127 43. Samaras, K.; Gan, S.K.; Peake, P.W.; Carr, A.; Campbell, L.V. Proinflammatory  
128 markers, insulin sensitivity, and cardiometabolic risk factors in treated hiv  
129 infection. *Obesity (Silver Spring)* **2009**, *17*, 53-59.
- 130 44. Mahamid, M.; Abu-Elhija, O.; Samamra, M.; Mahamid, A.; Nseir, W. Association  
131 between vitamin d levels and alopecia areata. *Isr Med Assoc J* **2014**, *16*, 367-370.
- 132 45. Howard, A.N.; Thurnham, D.I. Lutein and atherosclerosis: Belfast versus toulouse  
133 revisited. *Med Hypotheses* **2017**, *98*, 63-68.
- 134 46. Buono, C.; Come, C.E.; Witztum, J.L.; Maguire, G.F.; Connelly, P.W.; Carroll, M.;  
135 Lichtman, A.H. Influence of c3 deficiency on atherosclerosis. *Circulation* **2002**, *105*,  
136 3025-3031.
- 137 47. Ballanti, E.; Perricone, C.; di Muzio, G.; Kroegler, B.; Chimenti, M.S.; Graceffa, D.;  
138 Perricone, R. Role of the complement system in rheumatoid arthritis and psoriatic  
139 arthritis: Relationship with anti-tnf inhibitors. *Autoimmun Rev* **2011**, *10*, 617-623.
- 140 48. Jansen, J.; Delaere, L.; Spielberg, L.; Leys, A. Long-term fundus changes in acquired  
141 partial lipodystrophy. *BMJ Case Rep* **2013**, 2013.
- 142 49. Savage, D.B.; Semple, R.K.; Clatworthy, M.R.; Lyons, P.A.; Morgan, B.P.; Cochran,  
143 E.K.; Gorden, P.; Raymond-Barker, P.; Murgatroyd, P.R.; Adams, C., *et al.*  
144 Complement abnormalities in acquired lipodystrophy revisited. *J Clin Endocrinol*  
145 *Metab* **2009**, *94*, 10-16.
- 146 50. Yavuz, S.; Acarturk, T.O. Acquired partial lipodystrophy with c3  
147 hypocomplementemia and antiphospholipid and anticardiolipin antibodies. *Pediatr*  
148 *Dermatol* **2010**, *27*, 504-508.
- 149 51. Kulkarni, S.; Punia, R.S.; Kundu, R.; Thami, G.P.; Mohan, H. Direct  
150 immunofluorescence pattern and histopathological staging in alopecia areata. *Int J*  
151 *Trichology* **2014**, *6*, 164-167.
- 152 52. Fairhurst, D.A.; Mitra, A.; MacDonald-Hull, S. Direct immunofluorescence studies  
153 of patients with alopecia areata in affected and clinically normal areas of scalp. *J Eur*  
154 *Acad Dermatol Venereol* **2009**, *23*, 347-348.
- 155 53. Zirlik, A.; Bavendiek, U.; Libby, P.; MacFarlane, L.; Gerdes, N.; Jagielska, J.; Ernst,  
156 S.; Aikawa, M.; Nakano, H.; Tsitsikov, E., *et al.* Traf-1, -2, -3, -5, and -6 are induced in  
157 atherosclerotic plaques and differentially mediate proinflammatory functions of  
158 cd40l in endothelial cells. *Arterioscler Thromb Vasc Biol* **2007**, *27*, 1101-1107.
- 159 54. Missiou, A.; Kostlin, N.; Varo, N.; Rudolf, P.; Aichele, P.; Ernst, S.; Munkel, C.;  
160 Walter, C.; Stachon, P.; Sommer, B., *et al.* Tumor necrosis factor receptor-associated  
161 factor 1 (traf1) deficiency attenuates atherosclerosis in mice by impairing monocyte  
162 recruitment to the vessel wall. *Circulation* **2010**, *121*, 2033-2044.
- 163 55. Cheng, T.; Sun, X.; Wu, J.; Wang, M.; Eisenberg, R.A.; Chen, Z. Increased serum  
164 levels of tumor necrosis factor receptor-associated factor 1 (traf1) correlate with  
165 disease activity and autoantibodies in rheumatoid arthritis. *Clin Chim Acta* **2016**,  
166 *462*, 103-106.
- 167 56. de Souza Dantas Oliveira, S.H.; de Souza Aarão, T.L.; da Silva Barbosa, L.; Souza  
168 Lisbôa, P.G.; Tavares Dutra, C.D.; Margalho Sousa, L.; Simões Quaresma, J.A.; Feio  
169 Libonati, R.M. Immunohistochemical analysis of the expression of tnf-alpha,



170       tgf-beta, and caspase-3 in subcutaneous tissue of patients with hiv lipodystrophy  
171       syndrome. *Microbial Pathogenesis* **2014**, 67, 41-47.

172   57.   de Oliveira Pinto, L.M.; Garcia, S.; Lecoeur, H.; Rapp, C.; Gougeon, M.-L. Increased  
173       sensitivity of t lymphocytes to tumor necrosis factor receptor 1 (tnfr1)- and  
174       tnfr2-mediated apoptosis in hiv infection: Relation to expression of bcl-2 and active  
175       caspase-8 and caspase-3. *Blood* **2002**, 99, 1666-1675.

176   58.   Redler, S.; Brockschmidt, F.F.; Forstbauer, L.; Giehl, K.A.; Herold, C.; Eigelshoven,  
177       S.; Hanneken, S.; De Weert, J.; Lutz, G.; Wolff, H., *et al.* The traf1/c5 locus confers risk  
178       for familial and severe alopecia areata. *Br J Dermatol* **2010**, 162, 866-869.

179   59.   Paramel Varghese, G.; Folkersen, L.; Strawbridge, R.J.; Halvorsen, B.; Yndestad, A.;  
180       Ranheim, T.; Krohg-Sørensen, K.; Skjelland, M.; Espevik, T.; Aukrust, P., *et al.* Nlrp3  
181       inflammasome expression and activation in human atherosclerosis. *Journal of the*  
182       *American Heart Association* **2016**, 5.

183   60.   Tenger, C.; Sundborger, A.; Jawien, J.; Zhou, X. Il-18 accelerates atherosclerosis  
184       accompanied by elevation of ifn-gamma and cxcl16 expression independently of t  
185       cells. *Arterioscler Thromb Vasc Biol* **2005**, 25, 791-796.

186   61.   Meiler, S.; Lutgens, E.; Weber, C.; Gerdes, N. Atherosclerosis: Cell biology and  
187       lipoproteins-focus on interleukin-18 signaling, chemotactic heteromers, and  
188       micrnas. *Curr Opin Lipidol* **2016**, 27, 308-309.

189   62.   Kanameishi, S.; Nakamizo, S.; Endo, Y.; Fujisawa, A.; Dainichi, T.; Tanaka, T.;  
190       Izawa, K.; Nishikomori, R.; Kabashima, K. High level of serum human  
191       interleukin-18 in a patient with pyogenic arthritis, pyoderma gangrenosum and  
192       acne syndrome. *J Eur Acad Dermatol Venereol* **2017**, 31, e115-e116.

193   63.   Gracie, J.A.; Forsey, R.J.; Chan, W.L.; Gilmour, A.; Leung, B.P.; Greer, M.R.;  
194       Kennedy, K.; Carter, R.; Wei, X.Q.; Xu, D., *et al.* A proinflammatory role for il-18 in  
195       rheumatoid arthritis. *J Clin Invest* **1999**, 104, 1393-1401.

196   64.   Iannello, A.; Samarani, S.; Debbeche, O.; Boulassel, M.R.; Tremblay, C.; Toma, E.;  
197       Routy, J.P.; Ahmad, A. Potential role of il-18 in the immunopathogenesis of aids,  
198       hiv-associated lipodystrophy and related clinical conditions. *Curr HIV Res* **2010**, 8,  
199       147-164.

200   65.   Lindegaard, B.; Hansen, A.B.; Pilegaard, H.; Keller, P.; Gerstoft, J.; Pedersen, B.K.  
201       Adipose tissue expression of il-18 and hiv-associated lipodystrophy. *AIDS* **2004**, 18,  
202       1956-1958.

203   66.   Lee, D.; Hong, S.K.; Park, S.W.; Hur, D.Y.; Shon, J.H.; Shin, J.G.; Hwang, S.W.; Sung,  
204       H.S. Serum levels of il-18 and sil-2r in patients with alopecia areata receiving  
205       combined therapy with oral cyclosporine and steroids. *Exp Dermatol* **2010**, 19,  
206       145-147.

207   67.   Lee, J.H.; Cho, D.H.; Park, H.J. Il-18 and cutaneous inflammatory diseases. *Int J Mol*  
208       *Sci* **2015**, 16, 29357-29369.

209   68.   Higashi, Y.; Sukhanov, S.; Anwar, A.; Shai, S.Y.; Delafontaine, P. Aging,  
210       atherosclerosis, and igf-1. *J Gerontol A Biol Sci Med Sci* **2012**, 67, 626-639.

211   69.   Soler Palacios, B.; Estrada-Capetillo, L.; Izquierdo, E.; Criado, G.; Nieto, C.; Municio,  
212       C.; González-Alvaro, I.; Sánchez-Mateos, P.; Pablos, J.L.; Corbí, A.L., *et al.*

- Macrophages from the synovium of active rheumatoid arthritis exhibit an activin a-dependent pro-inflammatory profile. *The Journal of Pathology* **2015**, 235, 515-526.
70. van den Berg, W.B. The role of cytokines and growth factors in cartilage destruction in osteoarthritis and rheumatoid arthritis. *Z Rheumatol* **1999**, 58, 136-141.
71. Hui, W.; Rowan, A.D.; Cawston, T. Modulation of the expression of matrix metalloproteinase and tissue inhibitors of metalloproteinases by tgfbeta1 and igf-1 in primary human articular and bovine nasal chondrocytes stimulated with tnfa. *Cytokine* **2001**, 16, 31-35.
72. Boucher, J.; Softic, S.; El Ouaamari, A.; Krumpoch, M.T.; Kleinridders, A.; Kulkarni, R.N.; O'Neill, B.T.; Kahn, C.R. Differential roles of insulin and igf-1 receptors in adipose tissue development and function. *Diabetes* **2016**, 65, 2201-2213.
73. Bergfeld, W.F. Growth hormone deficiency in a young patient with alopecia areata. *J Invest Dermatol Symp Proc* **2013**, 16, S54-55.
74. Tang, L.; Bernardo, O.; Bolduc, C.; Lui, H.; Madani, S.; Shapiro, J. The expression of insulin-like growth factor 1 in follicular dermal papillae correlates with therapeutic efficacy of finasteride in androgenetic alopecia. *J Am Acad Dermatol* **2003**, 49, 229-233.
75. Leung, V.; Chiu, Y.L.; Kotler, D.P.; Albu, J.; Zhu, Y.S.; Ham, K.; Engelson, E.S.; Hammad, H.; Christos, P.; Donovan, D.S., *et al.* Effect of recombinant human growth hormone and rosiglitazone for hiv-associated abdominal fat accumulation on adiponectin and other markers of inflammation. *HIV Clin Trials* **2016**, 17, 55-62.
76. Okazaki, S.; Sakaguchi, M.; Miwa, K.; Furukado, S.; Yamagami, H.; Yagita, Y.; Mochizuki, H.; Kitagawa, K. Association of interleukin-6 with the progression of carotid atherosclerosis: A 9-year follow-up study. *Stroke* **2014**, 45, 2924-2929.
77. Hartman, J.; Frishman, W.H. Inflammation and atherosclerosis: A review of the role of interleukin-6 in the development of atherosclerosis and the potential for targeted drug therapy. *Cardiol Rev* **2014**, 22, 147-151.
78. Dong, S.; Xia, T.; Wang, L.; Zhao, Q.; Tian, J. Investigation of candidate genes for osteoarthritis based on gene expression profiles. *Acta Orthop Traumatol Turc* **2016**, 50, 686-690.
79. Kim, G.W.; Lee, N.R.; Pi, R.H.; Lim, Y.S.; Lee, Y.M.; Lee, J.M.; Jeong, H.S.; Chung, S.H. Il-6 inhibitors for treatment of rheumatoid arthritis: Past, present, and future. *Arch Pharm Res* **2015**, 38, 575-584.
80. Loonam, C.R.; O'Dell, S.D.; Sharp, P.A.; Mullen, A. Microarray analysis reveals altered lipid and glucose metabolism genes in differentiated, ritonavir-treated 3t3-l1 adipocytes. *Curr HIV Res* **2016**, 14, 37-46.
81. Kannisto, K.; Sutinen, J.; Korshennikova, E.; Fisher, R.M.; Ehrenborg, E.; Gertow, K.; Virkamaki, A.; Nyman, T.; Vidal, H.; Hamsten, A., *et al.* Expression of adipogenic transcription factors, peroxisome proliferator-activated receptor gamma co-activator 1, il-6 and cd45 in subcutaneous adipose tissue in lipodystrophy associated with highly active antiretroviral therapy. *AIDS* **2003**, 17, 1753-1762.
82. Rossi, A.; Cantisani, C.; Carlesimo, M.; Scarno, M.; Scali, E.; Mari, E.; Garelli, V.; Maxia, C.; Calvieri, S. Serum concentrations of il-2, il-6, il-12 and tnfa in patients with alopecia areata. *Int J Immunopathol Pharmacol* **2012**, 25, 781-788.

- 257 83. Yu, M.; Kissling, S.; Freyschmidt-Paul, P.; Hoffmann, R.; Shapiro, J.; McElwee, K.J.  
258 Interleukin-6 cytokine family member oncostatin m is a hair-follicle-expressed  
259 factor with hair growth inhibitory properties. *Exp Dermatol* **2008**, *17*, 12-19.
- 260 84. Bruunsgaard, H.; Skinhoj, P.; Pedersen, A.N.; Schroll, M.; Pedersen, B.K. Ageing,  
261 tumour necrosis factor-alpha (tnf-alpha) and atherosclerosis. *Clin Exp Immunol* **2000**,  
262 *121*, 255-260.
- 263 85. Kleinbongard, P.; Heusch, G.; Schulz, R. Tnfalpha in atherosclerosis, myocardial  
264 ischemia/reperfusion and heart failure. *Pharmacol Ther* **2010**, *127*, 295-314.
- 265 86. Jia, G.; Cheng, G.; Gangahar, D.M.; Agrawal, D.K. Insulin-like growth factor-1 and  
266 tnf-alpha regulate autophagy through c-jun n-terminal kinase and akt pathways in  
267 human atherosclerotic vascular smooth cells. *Immunol Cell Biol* **2006**, *84*, 448-454.
- 268 87. Mewar, D.; Wilson, A.G. Treatment of rheumatoid arthritis with tumour necrosis  
269 factor inhibitors. *Br J Pharmacol* **2011**, *162*, 785-791.
- 270 88. Muller-Ladner, U.; Pap, T.; Gay, R.E.; Neidhart, M.; Gay, S. Mechanisms of disease:  
271 The molecular and cellular basis of joint destruction in rheumatoid arthritis. *Nat*  
272 *Clin Pract Rheumatol* **2005**, *1*, 102-110.
- 273 89. Brennan, F.M.; Chantry, D.; Jackson, A.; Maini, R.; Feldmann, M. Inhibitory effect of  
274 tnf alpha antibodies on synovial cell interleukin-1 production in rheumatoid  
275 arthritis. *Lancet* **1989**, *2*, 244-247.
- 276 90. Moelants, E.A.; Mortier, A.; Van Damme, J.; Proost, P. Regulation of tnf-alpha with  
277 a focus on rheumatoid arthritis. *Immunol Cell Biol* **2013**, *91*, 393-401.
- 278 91. Mahajan, S.D.; Gaekwad, A.; Pawar, J.; Tripathy, S.; Ghate, M.; Bhattacharya, J.;  
279 Singh, H.O.; Schwartz, S.A.; Paranjape, R.; Gangakhedkar, R. Cardiac morbidity in  
280 an hiv-1 lipodystrophy patient cohort expressing the tnf-alpha-238 g/a single  
281 nucleotide gene polymorphism. *Curr HIV Res* **2015**, *13*, 98-108.
- 282 92. Prins, J.B.; Niesler, C.U.; Winterford, C.M.; Bright, N.A.; Siddle, K.; O'Rahilly, S.;  
283 Walker, N.I.; Cameron, D.P. Tumor necrosis factor-alpha induces apoptosis of  
284 human adipose cells. *Diabetes* **1997**, *46*, 1939-1944.
- 285 93. Lichtenstein, K.A. Redefining lipodystrophy syndrome: Risks and impact on  
286 clinical decision making. *J Acquir Immune Defic Syndr* **2005**, *39*, 395-400.
- 287 94. Kasumagic-Halilovic, E.; Prohic, A.; Cavaljuga, S. Tumor necrosis factor-alpha in  
288 patients with alopecia areata. *Indian J Dermatol* **2011**, *56*, 494-496.
- 289 95. Gregoriou, S.; Papafragkaki, D.; Kontochristopoulos, G.; Rallis, E.; Kalogeromitros,  
290 D.; Rigopoulos, D. Cytokines and other mediators in alopecia areata. *Mediators*  
291 *Inflamm* **2010**, *2010*, 928030.
- 292 96. Philpott, M.P.; Sanders, D.A.; Bowen, J.; Kealey, T. Effects of interleukins,  
293 colony-stimulating factor and tumour necrosis factor on human hair follicle growth  
294 in vitro: A possible role for interleukin-1 and tumour necrosis factor-alpha in  
295 alopecia areata. *Br J Dermatol* **1996**, *135*, 942-948.
- 296 97. Brydun, A.; Watari, Y.; Yamamoto, Y.; Okuhara, K.; Teragawa, H.; Kono, F.;  
297 Chayama, K.; Oshima, T.; Ozono, R. Reduced expression of heme oxygenase-1 in  
298 patients with coronary atherosclerosis. *Hypertens Res* **2007**, *30*, 341-348.
- 299 98. Wu, M.L.; Ho, Y.C.; Lin, C.Y.; Yet, S.F. Heme oxygenase-1 in inflammation and  
300 cardiovascular disease. *Am J Cardiovasc Dis* **2011**, *1*, 150-158.

- 301 99. Zwerina, J.; Tzima, S.; Hayer, S.; Redlich, K.; Hoffmann, O.; Hanslik-Schnabel, B.;  
302 Smolen, J.S.; Kollias, G.; Schett, G. Heme oxygenase 1 (ho-1) regulates  
303 osteoclastogenesis and bone resorption. *FASEB J* **2005**, *19*, 2011-2013.
- 304 100. Rueda, B.; Oliver, J.; Robledo, G.; Lopez-Nevot, M.A.; Balsa, A.; Pascual-Salcedo, D.;  
305 Gonzalez-Gay, M.A.; Gonzalez-Escribano, M.F.; Martin, J. Ho-1 promoter  
306 polymorphism associated with rheumatoid arthritis. *Arthritis Rheum* **2007**, *56*,  
307 3953-3958.
- 308 101. Manente, L.; Lucariello, A.; Costanzo, C.; Viglietti, R.; Parrella, G.; Parrella, R.;  
309 Gargiulo, M.; De Luca, A.; Chirianni, A.; Esposito, V. Suppression of pre adipocyte  
310 differentiation and promotion of adipocyte death by anti-hiv drugs. *In Vivo* **2012**, *26*,  
311 287-291.
- 312 102. Yun, S.J.; Kim, H.S.; Choi, J.Y.; Lee, J.B.; Kim, S.J.; Won, Y.H.; Lee, S.C. Decreased  
313 heme oxygenase-1 expression in the scalp of patients with alopecia areata: The  
314 pathogenic role of heme oxygenase-1. *J Dermatol Sci* **2009**, *54*, 43-45.
- 315 103. Payne, G.A.; Tune, J.D.; Knudson, J.D. Leptin-induced endothelial dysfunction: A  
316 target for therapeutic interventions. *Curr Pharm Des* **2014**, *20*, 603-608.
- 317 104. Abella, V.; Scotece, M.; Conde, J.; Pino, J.; Gonzalez-Gay, M.A.; Gomez-Reino, J.J.;  
318 Mera, A.; Lago, F.; Gomez, R.; Gualillo, O. Leptin in the interplay of inflammation,  
319 metabolism and immune system disorders. *Nat Rev Rheumatol* **2017**, *13*, 100-109.
- 320 105. Paz-Filho, G.; Mastronardi, C.A.; Licinio, J. Leptin treatment: Facts and  
321 expectations. *Metabolism* **2015**, *64*, 146-156.
- 322 106. Yang, C.C.; Chung, P.L.; Lin, L.Y.; Hughes, M.W.; Tsai, Y.S. Higher plasma leptin is  
323 associated with higher risk of androgenetic alopecia in men. *Exp Dermatol* **2017**, *26*,  
324 524-526.
- 325 107. Lee, Y.W.; Hirani, A.A. Role of interleukin-4 in atherosclerosis. *Arch Pharm Res* **2006**,  
326 *29*, 1-15.
- 327 108. Wojdasiewicz, P.; Poniatowski, L.A.; Szukiewicz, D. The role of inflammatory and  
328 anti-inflammatory cytokines in the pathogenesis of osteoarthritis. *Mediators Inflamm*  
329 **2014**, *2014*, 561459.
- 330 109. Dragovic, G.; Dimitrijevic, B.; Khawla, A.M.; Soldatovic, I.; Andjic, M.; Jevtovic, D.;  
331 Nair, D. Lower levels of il-4 and il-10 influence lipodystrophy in hiv/aids patients  
332 under antiretroviral therapy. *Exp Mol Pathol* **2017**, *102*, 210-214.
- 333 110. Alli, R.; Nguyen, P.; Boyd, K.; Sundberg, J.P.; Geiger, T.L. A mouse model of clonal  
334 cd8+ t lymphocyte-mediated alopecia areata progressing to alopecia universalis. *J*  
335 *Immunol* **2012**, *188*, 477-486.
- 336 111. McLaren, J.E.; Ramji, D.P. Interferon gamma: A master regulator of atherosclerosis.  
337 *Cytokine Growth Factor Rev* **2009**, *20*, 125-135.
- 338 112. Lee, S.H.; Kwon, J.Y.; Kim, S.Y.; Jung, K.; Cho, M.L. Interferon-gamma regulates  
339 inflammatory cell death by targeting necroptosis in experimental autoimmune  
340 arthritis. *Sci Rep* **2017**, *7*, 10133.
- 341 113. Liu, Y.; Ramot, Y.; Torrelo, A.; Paller, A.S.; Si, N.; Babay, S.; Kim, P.W.; Sheikh, A.;  
342 Lee, C.C.; Chen, Y., *et al.* Mutations in proteasome subunit beta type 8 cause chronic  
343 atypical neutrophilic dermatosis with lipodystrophy and elevated temperature with  
344 evidence of genetic and phenotypic heterogeneity. *Arthritis Rheum* **2012**, *64*, 895-907.

345 114. Castelar, L.; Silva, M.M.; Castelli, E.C.; Deghaide, N.H.; Mendes-Junior, C.T.;  
346 Machado, A.A.; Donadi, E.A.; Fernandes, A.P. Interleukin-18 and interferon-gamma  
347 polymorphisms in brazilian human immunodeficiency virus-1-infected patients  
348 presenting with lipodystrophy syndrome. *Tissue Antigens* **2010**, *76*, 126-130.

349 115. Arca, E.; Musabak, U.; Akar, A.; Erbil, A.H.; Tastan, H.B. Interferon-gamma in  
350 alopecia areata. *Eur J Dermatol* **2004**, *14*, 33-36.

351 116. Derecka, M.; Gornicka, A.; Koralov, S.B.; Szczepanek, K.; Morgan, M.; Raje, V.;  
352 Sisler, J.; Zhang, Q.; Otero, D.; Cichy, J., *et al.* Tyk2 and stat3 regulate brown adipose  
353 tissue differentiation and obesity. *Cell Metab* **2012**, *16*, 814-824.

354 117. Jacobsen, M.; Repsilber, D.; Kleinsteinuber, K.; Gutschmidt, A.; Schommer-Leitner, S.;  
355 Black, G.; Walzl, G.; Kaufmann, S.H. Suppressor of cytokine signaling-3 is affected  
356 in t-cells from tuberculosis patients. *Clin Microbiol Infect* **2011**, *17*, 1323-1331.

357 118. Chang, M.C.; Chiang, Y.C.; Ho, C.M.; Chen, Y.L.; Chen, C.A.; Cheng, W.F.; Chou,  
358 C.Y. New primers for methylation-specific polymerase chain reaction enhance  
359 specificity of detecting stat1 methylation. *Taiwan J Obstet Gynecol* **2012**, *51*, 43-49.

360 119. Hambleton, S.; Goodbourn, S.; Young, D.F.; Dickinson, P.; Mohamad, S.M.;  
361 Valappil, M.; McGovern, N.; Cant, A.J.; Hackett, S.J.; Ghazal, P., *et al.* Stat2  
362 deficiency and susceptibility to viral illness in humans. *Proc Natl Acad Sci U S A*  
363 **2013**, *110*, 3053-3058.

364 120. Patel, K.; Kollory, A.; Takashima, A.; Sarkar, S.; Faller, D.V.; Ghosh, S.K. MicroRNA  
365 let-7 downregulates stat3 phosphorylation in pancreatic cancer cells by increasing  
366 socs3 expression. *Cancer Lett* **2014**, *347*, 54-64.

367 121. Liu, F.; Guo, J.; Tian, T.; Wang, H.; Dong, F.; Huang, H.; Dong, M. Placental  
368 trophoblasts shifted th1/th2 balance toward th2 and inhibited th17 immunity at  
369 fetomaternal interface. *APMIS* **2011**, *119*, 597-604.

370 122. Cantu, C.; Ierardi, R.; Alborelli, I.; Fugazza, C.; Cassinelli, L.; Piconese, S.; Bose, F.;  
371 Ottolenghi, S.; Ferrari, G.; Ronchi, A. Sox6 enhances erythroid differentiation in  
372 human erythroid progenitors. *Blood* **2011**, *117*, 3669-3679.

373 123. Kooreman, N.G.; de Almeida, P.E.; Stack, J.P.; Nelakanti, R.V.; Diecke, S.; Shao,  
374 N.Y.; Swijnenburg, R.J.; Sanchez-Freire, V.; Matsa, E.; Liu, C., *et al.* Alloimmune  
375 responses of humanized mice to human pluripotent stem cell therapeutics. *Cell*  
376 *reports* **2017**, *20*, 1978-1990.

377 124. Mogilenko, D.A.; Kudriavtsev, I.V.; Trulioff, A.S.; Shavva, V.S.; Dizhe, E.B.;  
378 Missyul, B.V.; Zhakhov, A.V.; Ischenko, A.M.; Perevozchikov, A.P.; Orlov, S.V.  
379 Modified low density lipoprotein stimulates complement c3 expression and  
380 secretion via liver x receptor and toll-like receptor 4 activation in human  
381 macrophages. *J Biol Chem* **2012**, *287*, 5954-5968.

382 125. Kefaloyianni, E.; Muthu, M.L.; Kaeppler, J.; Sun, X.; Sabbisetti, V.; Chalaris, A.;  
383 Rose-John, S.; Wong, E.; Sagi, I.; Waikar, S.S., *et al.* Adam17 substrate release in  
384 proximal tubule drives kidney fibrosis. *JCI Insight* **2016**, *1*.

385 126. Pravenec, M.; Kajiya, T.; Zidek, V.; Landa, V.; Mlejnek, P.; Simakova, M.; Silhavy, J.;  
386 Malinska, H.; Oliyarnyk, O.; Kazdova, L., *et al.* Effects of human c-reactive protein  
387 on pathogenesis of features of the metabolic syndrome. *Hypertension* **2011**, *57*,  
388 731-737.

127. Das, H.; Koizumi, T.; Sugimoto, T.; Chakraborty, S.; Ichimura, T.; Hasegawa, K.; Nishimura, R. Quantitation of fas and fas ligand gene expression in human ovarian, cervical and endometrial carcinomas using real-time quantitative rt-pcr. *Br J Cancer* **2000**, *82*, 1682-1688.
128. Jais, A.; Einwallner, E.; Sharif, O.; Gossens, K.; Lu, T.T.; Soyak, S.M.; Medgyesi, D.; Neureiter, D.; Paier-Pourani, J.; Dalgaard, K., *et al.* Heme oxygenase-1 drives metaflammation and insulin resistance in mouse and man. *Cell* **2014**, *158*, 25-40.
129. Di, D.; Chen, L.; Wang, L.; Sun, P.; Liu, Y.; Xu, Z.; Ju, J. Downregulation of human intercellular adhesion molecule-1 attenuates the metastatic ability in human breast cancer cell lines. *Oncol Rep* **2016**, *35*, 1541-1548.
130. Narantuya, D.; Nagai, A.; Sheikh, A.M.; Masuda, J.; Kobayashi, S.; Yamaguchi, S.; Kim, S.U. Human microglia transplanted in rat focal ischemia brain induce neuroprotection and behavioral improvement. *PLoS One* **2010**, *5*, e11746.
131. Flannery, C.A.; Rowzee, A.M.; Choe, G.H.; Saleh, F.L.; Radford, C.C.; Taylor, H.S.; Wood, T.L. Development of a quantitative pcr assay for detection of human insulin-like growth factor receptor and insulin receptor isoforms. *Endocrinology* **2016**, *157*, 1702-1708.
132. Zannetti, C.; Roblot, G.; Charrier, E.; Ainouze, M.; Tout, I.; Briat, F.; Isorce, N.; Faure-Dupuy, S.; Michelet, M.; Marotel, M., *et al.* Characterization of the inflammasome in human kupffer cells in response to synthetic agonists and pathogens. *J Immunol* **2016**, *197*, 356-367.
133. Steensberg, A.; Keller, C.; Starkie, R.L.; Osada, T.; Febbraio, M.A.; Pedersen, B.K. Il-6 and tnfr-alpha expression in, and release from, contracting human skeletal muscle. *Am J Physiol Endocrinol Metab* **2002**, *283*, E1272-1278.
134. Nacul, A.P.; Lecke, S.B.; Edelweiss, M.I.; Morsch, D.M.; Spritzer, P.M. Gene expression of leptin and long leptin receptor isoform in endometriosis: A case-control study. *Obstet Gynecol Int* **2013**, *2013*, 879618.
135. Pettinelli, P.; Videla, L.A. Up-regulation of ppar-gamma mRNA expression in the liver of obese patients: An additional reinforcing lipogenic mechanism to srebp-1c induction. *J Clin Endocrinol Metab* **2011**, *96*, 1424-1430.
136. Xie, S.; Macedo, P.; Hew, M.; Nassenstein, C.; Lee, K.Y.; Chung, K.F. Expression of transforming growth factor-beta (tgfbeta) in chronic idiopathic cough. *Respir Res* **2009**, *10*, 40.
137. Grenon, S.M.; Jeanne, M.; Aguado-Zuniga, J.; Conte, M.S.; Hughes-Fulford, M. Effects of gravitational mechanical unloading in endothelial cells: Association between caveolins, inflammation and adhesion molecules. *Sci Rep* **2013**, *3*, 1494.
138. Carmona Arana, J.A.; Seher, A.; Neumann, M.; Lang, I.; Siegmund, D.; Wajant, H. Tnf receptor-associated factor 1 is a major target of soluble tweak. *Front Immunol* **2014**, *5*, 63.
139. Chang, C.C.; Huang, C.C.; Yang, S.H.; Chien, C.C.; Lee, C.L.; Huang, C.J. Data on clinical significance of gas2 in colorectal cancer cells. *Data in brief* **2016**, *8*, 82-86.
